# Supplementary material
Source: HighWire-hosted journal article supplement (http://www.jrheum.org/highwire/filestream/29719/field_highwire_adjunct_files/0/140976DataSuppl.pdf)
Supplement: 140976DataSuppl.pdf [file 140976DataSuppl.pdf]

## **ONLINE SUPPLEMENTARY DATA**

### **Survey Questions**

#### ***Good Days Fast survey***

##### **Q1. Are you:**

- Male
- Female

##### **Q2. How old are you?**

##### **Q3. What is your current working status?**

- Employed full-time (30+ hours per week)
- Employed part-time (Less than 30 hours per week)
- Self-employed
- Retired
- Home-maker/Housewife
- Unemployed/receiving benefits
- Full time education
- Other

##### **Q4. What is your current marital status?**

- Married
- Living with partner
- Single (divorced/separated)
- Single (widowed)
- Single (never married)

##### **Q5. Which of the following medical conditions do you currently have?**

- Heart disease
- High blood pressure
- Osteoporosis
- Rheumatoid Arthritis
- Osteoarthritis
- Asthma
- None of the above

##### **Q6. Approximately how long ago were you first diagnosed with Rheumatoid Arthritis?**

- Less than 6 months

- More than 6 months
- Over a year

**Q7. How would you describe the severity of your Rheumatoid Arthritis?**

- Mild
- Moderate
- Severe

**Q8. How has RA affected your participation in the following activities? Which activities has RA stopped you from doing at all and which do you find painful or more difficult to do?**

|                                                         | <b>RA pain has stopped me from doing this activity at all</b> | <b>Always painful /more difficult</b> | <b>Sometimes painful / more difficult</b> | <b>RA has no effect on this activity</b> | <b>Not applicable</b> | <b>Decline</b> |
|---------------------------------------------------------|---------------------------------------------------------------|---------------------------------------|-------------------------------------------|------------------------------------------|-----------------------|----------------|
| Driving                                                 |                                                               |                                       |                                           |                                          |                       |                |
| Cooking                                                 |                                                               |                                       |                                           |                                          |                       |                |
| Shopping for groceries / clothes                        |                                                               |                                       |                                           |                                          |                       |                |
| Gardening                                               |                                                               |                                       |                                           |                                          |                       |                |
| Playing with children, grandchildren or young relatives |                                                               |                                       |                                           |                                          |                       |                |
| Beauty regime (putting on make-up, styling hair etc.)   |                                                               |                                       |                                           |                                          |                       |                |
| Sleeping                                                |                                                               |                                       |                                           |                                          |                       |                |
| Going out to restaurants, bars, cinema                  |                                                               |                                       |                                           |                                          |                       |                |
| Housework                                               |                                                               |                                       |                                           |                                          |                       |                |
| Doing your favourite hobby                              |                                                               |                                       |                                           |                                          |                       |                |
| Keeping fit/sport                                       |                                                               |                                       |                                           |                                          |                       |                |
| Entertaining at home                                    |                                                               |                                       |                                           |                                          |                       |                |

|                                                                    |  |  |  |  |  |  |
|--------------------------------------------------------------------|--|--|--|--|--|--|
| Being intimate with partner/husband                                |  |  |  |  |  |  |
| Physiotherapy or other health-related exercises                    |  |  |  |  |  |  |
| Administering your own medication                                  |  |  |  |  |  |  |
| Spending time enjoying outdoor activities eg. walks in the country |  |  |  |  |  |  |

**Q9. Thinking now about the Christmas/Holiday season, which of the following activities do you find difficult to do as a result of having RA?**

|                                         | <b>RA pain has stopped me from doing this activity at all</b> | <b>Always painful / more difficult</b> | <b>Sometimes painful / more difficult</b> | <b>RA has no effect on this activity</b> | <b>Not applicable</b> |
|-----------------------------------------|---------------------------------------------------------------|----------------------------------------|-------------------------------------------|------------------------------------------|-----------------------|
| Wrapping presents                       |                                                               |                                        |                                           |                                          |                       |
| Writing Christmas cards                 |                                                               |                                        |                                           |                                          |                       |
| Preparing festive food                  |                                                               |                                        |                                           |                                          |                       |
| Attending celebrations and parties      |                                                               |                                        |                                           |                                          |                       |
| Going shopping for Christmas presents   |                                                               |                                        |                                           |                                          |                       |
| Spending time with family and friends   |                                                               |                                        |                                           |                                          |                       |
| Going to church or religious ceremonies |                                                               |                                        |                                           |                                          |                       |

**Q10. Moving on to your working life, which of the following have you had to do as a result of having RA?**

- Stop working altogether/Retire early
- Change the kind of job you do (eg. office work vs working outdoors)
- Take a pay cut
- Resist from promotion or career advancement

- Work part-time instead of full-time
- Take more than 10 days sick off work in an average year
- Routinely attend medical appointments during work time
- Have your workstation or working environment modified
- Inform your employer or colleagues about your condition
- None of the above

**Q11. How often are you less productive at work than you would like to be due to RA?**

- Always
- Often
- Sometimes
- Rarely
- Never

**Q12. On the next screen are a series of statements that other RA patients have said about their lifestyle. Please indicate the extent to which you agree or disagree with each statement.**

|                                                                                             | <b>Agree strongly</b> | <b>Agree</b> | <b>Neither agree nor disagree</b> | <b>Disagree</b> | <b>Disagree strongly</b> | <b>Decline</b> |
|---------------------------------------------------------------------------------------------|-----------------------|--------------|-----------------------------------|-----------------|--------------------------|----------------|
| My friends and family don't really understand the pain or fatigue I suffer                  |                       |              |                                   |                 |                          |                |
| I find it very difficult to do 'normal' everyday activities due to RA                       |                       |              |                                   |                 |                          |                |
| Having RA has really affected my closest relationships for the worse                        |                       |              |                                   |                 |                          |                |
| I often worry about losing my independence when I'm older due to RA                         |                       |              |                                   |                 |                          |                |
| I don't enjoy family events like Christmas and birthdays as much as I used to because of RA |                       |              |                                   |                 |                          |                |

|                                                                                          |  |  |  |  |  |  |
|------------------------------------------------------------------------------------------|--|--|--|--|--|--|
| I feel as if RA has robbed me of my happiness                                            |  |  |  |  |  |  |
| I'm constantly looking for new ideas that can help with my pain                          |  |  |  |  |  |  |
| It's often difficult for me to do something spontaneous these days due to RA             |  |  |  |  |  |  |
| RA has given me a new perspective on life and I am thankful for days/time when I am well |  |  |  |  |  |  |
| I frequently find my RA emotionally distressing                                          |  |  |  |  |  |  |
| I find it very difficult to explain my sexual needs to my partner/husband                |  |  |  |  |  |  |

**Q13. And here are some more statements that other RA patients have said about their lifestyle. Again, please indicate the extent to which you agree or disagree with each statement.**

|                                                                 | <b>Agree strongly</b> | <b>Agree</b> | <b>Neither agree nor disagree</b> | <b>Disagree</b> | <b>Disagree strongly</b> |
|-----------------------------------------------------------------|-----------------------|--------------|-----------------------------------|-----------------|--------------------------|
| I often feel that I am treated as though I am disabled          |                       |              |                                   |                 |                          |
| Because of my condition people think of me as elderly and frail |                       |              |                                   |                 |                          |
| People think I am helpless because of my RA                     |                       |              |                                   |                 |                          |
| I conceal pain from friends and family                          |                       |              |                                   |                 |                          |

|                                                                                         |  |  |  |  |  |
|-----------------------------------------------------------------------------------------|--|--|--|--|--|
| during social occasions or day to day living                                            |  |  |  |  |  |
| I can't make plans due to uncertainty around pain and mobility and fatigue              |  |  |  |  |  |
| I end up buying practical clothes or shoes rather than the stylish ones I really wanted |  |  |  |  |  |
| I have had to give up the foods I most enjoy eating                                     |  |  |  |  |  |
| RA forces me to compromise on choice of holiday destination                             |  |  |  |  |  |
| I feel isolated from my friends and family because of my RA                             |  |  |  |  |  |
| RA often makes me feel awkward in social situations                                     |  |  |  |  |  |
| I feel depressed a lot of the time because of my RA                                     |  |  |  |  |  |

**Q14. Are you currently taking pain-relief medication to treat your Rheumatoid Arthritis?**

- Yes
- No
- Don't know
- Declined

**Q15. Do you experience pain on a daily basis?**

- Yes
- No
- Don't know
- Declined

**Q16. How would you describe your experiences when visiting your doctor / physician?  
How often do you do or feel the following? (Click as many as apply)**

|                                                                              | <b>Always</b> | <b>Often</b> | <b>Sometimes</b> | <b>Rarely</b> | <b>Never</b> |
|------------------------------------------------------------------------------|---------------|--------------|------------------|---------------|--------------|
| Mention the pain you experience                                              |               |              |                  |               |              |
| Describe the type of pain you experience and how often you experience it     |               |              |                  |               |              |
| Accept advice given                                                          |               |              |                  |               |              |
| Challenge the advice you get                                                 |               |              |                  |               |              |
| Feel rushed and unable to talk about everything you want to                  |               |              |                  |               |              |
| Feel like you are complaining when you discuss your symptoms or side-effects |               |              |                  |               |              |
| Feel too shy to talk about how much pain you are really in                   |               |              |                  |               |              |
| Intend to talk about pain control, but not get around to it                  |               |              |                  |               |              |
| Discuss the level of tiredness/fatigue that you feel                         |               |              |                  |               |              |

**Q17. Would you describe your relationship with your doctor/physician as a partnership, where you are working together to manage your condition?**

- Yes
- No
- Don't know

**Q18. Would you like to have a partnership like this with your doctor / physician?**

- Yes
- No
- Don't know

**Q19. Would you describe your relationship with your specialist nurse as a partnership, where you are working together to manage your condition?**

- Yes
- No
- Don't know

**Q20. Would you like to have a partnership like this with your nurse?**

- Yes

- No
- Don't know

**Q21. Which of the following defines a good day for you? (Click the top 3 options which apply to you)**

- Having a day free of pain
- Experiencing pain relief quickly
- Being able to be intimate with my partner
- Being able to go to work
- Not feeling self-conscious because of arthritis
- Being able to do everyday things easily such as taking a shower, getting dressed etc
- Being free of fatigue, having energy
- No morning stiffness
- Being able to take care of/play with my children
- Being able to cook for my friends / family
- Being able to attend church / religious ceremonies
- Being able to participate in outdoor activities (walking, gardening etc)
- Other, please specify:

**Q22. Can you describe in a few words what a good day is like for you?**

**Q23. How often does your RA make you feel less self-confident in each of the following situations? (As before, for each situation, please click whether you feel less self-confident often, sometimes, rarely or never)**

|                                                              | Always | Often | Sometimes | Rarely | Never | N/A Declined |
|--------------------------------------------------------------|--------|-------|-----------|--------|-------|--------------|
| At work                                                      |        |       |           |        |       |              |
| When meeting new people                                      |        |       |           |        |       |              |
| With friends                                                 |        |       |           |        |       |              |
| In large social groups (eg. at parties or family gatherings) |        |       |           |        |       |              |
| Your sex life                                                |        |       |           |        |       |              |

**Q24. To what extent did RA play a role in your divorce/separation?**

- It was the main reason



- It played a big part but wasn't the main reason
- It had some role in the decision
- It had no impact at all
- Declined

**Q25. Do you think having RA makes it more difficult to find a partner?**

- Strongly agree
- Agree
- Neither agree or disagree
- Disagree
- Strongly disagree

**Q26 To what extent do you agree that the government understands and supports your condition?**

- Strongly agree
- Agree
- Neither agree or disagree
- Disagree
- Strongly disagree

***Getting to Your Destination Faster (GTYDF) survey***

**Q1. Are you:**

- Male
- Female

**Q2. Approximately how many years ago were you first diagnosed with rheumatoid arthritis?**

**Q3. How would you describe the severity of your rheumatoid arthritis?**

- Moderate
- Mild
- Severe

**Q4. What is your current working status?**

- Employed full-time (30+ hours per week)
- Employed part-time (less than 30 hours per week)

- Unemployed / receiving benefits
- Retired
- Home-maker / Housewife / Househusband
- Self-employed
- Full-time education
- Other
- Decline to answer

**Q5. Has your rheumatoid arthritis negatively impacted your employment status (e.g. stopped working altogether, moved from full-time to part-time work, forced you to change your job or job role)?**

- Yes, rheumatoid arthritis has negatively affected my employment status
- No, rheumatoid arthritis has not negatively affected my employment status

**Q6. What is your current marital status?**

- Married
- Single (divorced / separated)
- Living with partner
- Single (never married)
- Civil partnership
- Single (widowed)
- In a relationship
- Decline to answer

**Q7. Has your rheumatoid arthritis negatively affected your relationship (e.g. rheumatoid arthritis contributed to my divorce / separation, rheumatoid arthritis makes it difficult to find a new partner, RA contributes to arguments/tension with my partner)?**

- No, rheumatoid arthritis has no negative affect or hasn't negatively affected my relationship status
- Yes, rheumatoid arthritis negatively affects or has negatively affected my relationship status
- Decline to answer

**Q8. Are you currently taking medication as a result of your rheumatoid arthritis?**

- Yes

- No

**Q9. What medication(s) are you currently taking for your rheumatoid arthritis?**

- Painkillers like ibuprofen and naproxen (eg. medicine for symptomatic relief)
- Methotrexate, sulphasalazine, leflunomide, hydroxychloroquine (eg. DMARDs)
- Anti-TNF (eg, biologic DMARDs), rituxan / MabThera (rituximab), Orencia (abatacept), Actemra / RoActemra (tocilizumab), Remicade (infliximab), Cimzia (certolizumab pegol), Humira (adalimumab), Enbrel (etanercept)
- Other
- I don't know what medicine(s) I am currently taking

**Q10. Thinking about your rheumatoid arthritis, over the years, in total, how many different medicines do you think you have taken?**

- 1 - 2
- 3 - 4
- 5 - 6
- 7 – 10
- Over 10

**Q11. Thinking about the medicines taken to relieve your rheumatoid arthritis signs and symptoms (i.e. joint stiffness, joint swelling, fatigue, IN ADDITION TO pain relief), how quickly do you think they worked?**

- Within 3 months
- 3 – 6 months
- Over 6 months

**Q12. Let's say that you were given a medicine for your rheumatoid arthritis signs and symptoms (in addition to pain relief), how quickly would you EXPECT to feel an improvement in your signs and symptoms associated with rheumatoid arthritis?**

- Within 3 months
- 3 – 6 months
- Over 6 months

**Q13. Let's say that you were given a medicine for your rheumatoid arthritis signs and symptoms (in addition to pain relief), how quickly would you WANT to feel an improvement in your signs and symptoms associated with rheumatoid arthritis?**

- Within 3 months

- 3 – 6 months
- Over 6 months

**Q14. Let’s say you start a new medicine to treat your rheumatoid arthritis signs and symptoms (in addition to pain relief), if it’s not working, how long do you think you would wait before speaking to your doctor or nurse?**

- 1 week
- 2 weeks
- 3 weeks
- 4 weeks
- 6 weeks
- 8 weeks
- 12 weeks

**Q15. Think about what you would expect a rheumatoid arthritis medicine to deliver and please RANK the following items from the list below (top being what you most want from a rheumatoid arthritis medicine and bottom being what you find least important)**

|                                                                                                                | 1 | 2 | 3 | 4 |
|----------------------------------------------------------------------------------------------------------------|---|---|---|---|
| Pain relief                                                                                                    |   |   |   |   |
| Fatigue relief                                                                                                 |   |   |   |   |
| Improved work / home productivity (increased interaction with family and friends, greater ease in house tasks) |   |   |   |   |
| Reduced joint stiffness                                                                                        |   |   |   |   |

**Q16. In relation to rheumatoid arthritis, have you heard of any of the following medical terms?**

|            | Yes | No |
|------------|-----|----|
| CD AI      |     |    |
| ACR Score  |     |    |
| HIAQ Score |     |    |

|                     |  |  |
|---------------------|--|--|
| HRQoL               |  |  |
| SDAI                |  |  |
| DAS                 |  |  |
| DAS28               |  |  |
| Swollen joint count |  |  |
| RAPID 3             |  |  |

**Q17. In relation to rheumatoid arthritis, are you familiar with any of the following measurements?**

|                                                                   | Yes | No |
|-------------------------------------------------------------------|-----|----|
| Improvements in my pain                                           |     |    |
| Low disease activity                                              |     |    |
| Improvements in my activity and productivity levels               |     |    |
| Sleeping through the night and feeling refreshed in the morning   |     |    |
| Improvements in the signs and symptoms of my rheumatoid arthritis |     |    |
| Feeling more positive and confident in myself                     |     |    |

**Q18. Let's say that you have started taking a medicine for your rheumatoid arthritis. Would you set yourself PERSONAL or SOCIAL goals / targets when you first start this new medicine?**

- Yes
- No

**Q19. Let's say that you have started taking a medicine for your rheumatoid arthritis. Do you set yourself TREATMENT goals or targets when you first start a new treatment?**

- Yes
- No

**Q20. Can you describe in a few words what personal or social and treatment goals / targets you would like to set for yourself?**

**Q21. Thinking about your rheumatoid arthritis, below are a series of statements, please indicate which of the following statements you agree with:**

|                                                                                                                                                                        | <b>I agree</b> | <b>I do not agree</b> |
|------------------------------------------------------------------------------------------------------------------------------------------------------------------------|----------------|-----------------------|
| I feel anxious about initiating a new medicine because I'm unsure whether it will help reduce the signs and symptoms of my rheumatoid arthritis                        |                |                       |
| I feel less anxious about my medicine once I know it is helping to reduce the signs and symptoms of my rheumatoid arthritis                                            |                |                       |
| Knowing that my medicine is working makes me feel more self-confident                                                                                                  |                |                       |
| I want a treatment that works quickly                                                                                                                                  |                |                       |
| I think setting myself personal and social goals/targets would be of benefit as I can then assess whether my treatment is working or not in a simple to understand way |                |                       |
| I would find it helpful if my doctor / nurse provided examples of personal social goals / targets I should be setting to assess my condition and treatment             |                |                       |
| A treatment that works is a treatment that gets me to my personal and social goals / targets first                                                                     |                |                       |
| It's important to me to discuss my course of treatment with my healthcare professional                                                                                 |                |                       |
| Setting personal and social goals / targets (eg. to be able to do the washing up, ride my bike, walk further) would allow me to assess whether my treatment is working |                |                       |
| If I set myself personal and social goals / targets and achieved them I would feel positive                                                                            |                |                       |
| I would describe having a good day as a day with no pain or discomfort and energy filled                                                                               |                |                       |
| Having a good day would be a great goal / target for me                                                                                                                |                |                       |

**Q22. What do you feel is your biggest obstacle to controlling your rheumatoid arthritis symptoms?**

- Finding the right treatment option
- Lack of education and understanding of my disease
- Lack of assistance from my physician
- Lack of personal resolve
- Other (*please list*)

**Q23. Below are a series of statements that other rheumatoid arthritis patients have said about their activity levels and work/home productivity. Please indicate which of following statements you agree with:**

|                                                                                                                                         | <b>Agree strongly</b> | <b>Agree</b> | <b>Neither agree nor disagree</b> | <b>Disagree</b> | <b>Disagree strongly</b> |
|-----------------------------------------------------------------------------------------------------------------------------------------|-----------------------|--------------|-----------------------------------|-----------------|--------------------------|
| It is unrealistic to expect an improvement in my activity levels and work / home productivity by 3 months of initiating a new treatment |                       |              |                                   |                 |                          |
| I want to see an improvement in my activity levels and work / home productivity by 3 months following initiation of a new medicine      |                       |              |                                   |                 |                          |
| I want to be more productive at work and at home                                                                                        |                       |              |                                   |                 |                          |
| Being more active and able to participate in everyday activities (eg. gardening, cooking) is a priority for me                          |                       |              |                                   |                 |                          |

**Q24. Below are a series of statements about treatment and objectives to help patients with rheumatoid arthritis manage their disease. From a patient perspective, please indicate which of following statements you agree with:**

|  | <b>I agree</b> | <b>I do not agree</b> |
|--|----------------|-----------------------|
|  |                |                       |

|                                                                                                                             |  |  |
|-----------------------------------------------------------------------------------------------------------------------------|--|--|
| Establishing personal treatment targets for my rheumatoid arthritis will have a positive impact on my disease management    |  |  |
| Personal disease treatment targets for managing my rheumatoid arthritis are of no importance to me                          |  |  |
| I have heard of the treat-to-target approach in rheumatoid arthritis disease management                                     |  |  |
| My healthcare professional currently manages my rheumatoid arthritis intensively with strict goals and timeframes in place  |  |  |
| When I visit my healthcare professional I have in-depth discussions about how my rheumatoid arthritis is managed            |  |  |
| I would like to have more control over how my rheumatoid arthritis is managed                                               |  |  |
| I would like to have more in-depth discussions with my healthcare professional about how my rheumatoid arthritis is managed |  |  |
| My healthcare professional and I make shared decisions about how best to manage my rheumatoid arthritis                     |  |  |

**Q25. Has your healthcare professional discussed treating your rheumatoid arthritis with an approach that achieves PERSONAL or SOCIAL goals / targets (often referred to within the medical community as treat-to-target)?**

- Yes
- No

**Q26. In your opinion, as a patient, what does a targeted approach to disease management mean to you?**

- Setting personal lifestyle and treatment goals, and monitoring disease progress to achieve these goals
- Developing and adhering to a strict treatment plan
- Stronger pain relief medication
- More appointments and longer time with the healthcare professional
- Higher dosage of medication
- I do not know
- Other (*please specify*)



## ONLINE SUPPLEMENTARY TABLES

**Supplementary Table 1.** Patient characteristics/demographics of each survey.

| Characteristics                            | Good Days Fast | Getting to Your Destination Faster |                  |
|--------------------------------------------|----------------|------------------------------------|------------------|
| <b>No. of patients</b>                     | 1958           | 1829                               |                  |
| <b>No. of patients per country</b>         |                |                                    |                  |
| USA                                        | 300            | 303                                |                  |
| Canada                                     | 155            | [not included in this survey]      |                  |
| UK                                         | 300            | 306                                |                  |
| France                                     | 301            | 306                                |                  |
| Germany                                    | 300            | 304                                |                  |
| Italy                                      | 302            | 306                                |                  |
| Spain                                      | 300            | 304                                |                  |
| <b>Gender, n (%)</b>                       | Female (100.0) | Female: 1242 (67.9)                | Male: 587 (32.1) |
| <b>Age group, n (%)</b>                    |                | <u>Female</u>                      | <u>Male</u>      |
| 25-35                                      | 401 (20.5)     | 25-34: 164 (72.2)                  | 63 (27.8)        |
| 36-45                                      | 533 (27.2)     | 35-44: 257 (70.8)                  | 106 (29.2)       |
| 46-55                                      | 628 (32.1)     | 45-54: 425 (68.5)                  | 195 (31.5)       |
| 56-65                                      | 396 (20.2)     | 55-65: 396 (64.0)                  | 223 (36.0)       |
| <b>Time since RA diagnosis, n (%)</b>      |                |                                    |                  |
| ≥6 months                                  | 496 (25.3)     | [not available]                    |                  |
| ≥1 year                                    | 1462 (74.7)    |                                    |                  |
| <b>Disease activity, n (%)<sup>a</sup></b> |                |                                    |                  |
| mild                                       | 606 (30.9)     | 600 (32.8)                         |                  |
| moderate                                   | 1111 (56.7)    | 985 (53.9)                         |                  |
| severe                                     | 241 (12.3)     | 244 (13.3)                         |                  |
| <b>Relationship status, n (%)</b>          |                |                                    |                  |
| Married/living with partner                | 1347 (68.8)    | 1045 (57.1) <sup>b</sup>           |                  |
| Single                                     | 611 (31.2)     |                                    |                  |
| Divorced/separated                         | 295 (15.1)     | 208 (11.4)                         |                  |
| Never married                              | 233 (11.9)     | 189 (10.3)                         |                  |
| Widowed                                    | 83 (4.2)       | 57 (3.1)                           |                  |

<sup>a</sup>Patient-defined; <sup>b</sup>does not include: living with partner (190/10.4%), civil partnership (76/4.2%), in a relationship (55/3.0%)

**Supplementary Table 2.** Examples of personal, social and treatment goals set by patients.

**Q. Can you describe in a few words what personal, social or treatment goals you would like to set for yourself?**

Being able to walk for longer distances without pain

Being pain free and able to play more physical games with my child

Feel less tired so I can do things with my children

Have less pain at night so I can sleep through and feel refreshed and also be able to gently restart doing things at the gym

Feeling like going out more, sleeping better, less depressed

I would love to be able to sleep through the whole night without waking in pain

Play with grandchildren, walking, climbing stairs, sleep through the night

Pain relief and to regain the ability to grip tools (particularly garden tools) and to be able to open such everyday items as jam/sauce jars

Would like to be able to hold things without pain and dropping dishes, use my computer without pain, hold books, manage pain and be able to relax at night, don't want side effects and would like to reduce fatigue

A tablet that does not upset my liver function and my stomach

**Supplementary Table 3.** Patients' assessment of pain by country (Good Days Fast survey; N=1958).

|                                                                     | % patients (95% confidence interval) |                |                |                |                |                |                |
|---------------------------------------------------------------------|--------------------------------------|----------------|----------------|----------------|----------------|----------------|----------------|
|                                                                     | UK                                   | France         | Germany        | Italy          | Spain          | USA            | Canada         |
| <b>Feel like complaining when discussing symptoms</b>               | 77<br>(72, 82)                       | 80<br>(76, 85) | 64<br>(59, 70) | 73<br>(68, 78) | 71<br>(66, 76) | 71<br>(66, 77) | 72<br>(65, 79) |
| <b>Feel too shy to talk about how much pain is experienced</b>      | 58<br>(53, 64)                       | 58<br>(53, 64) | 55<br>(49, 61) | 64<br>(59, 69) | 58<br>(52, 64) | 40<br>(35, 46) | 48<br>(41, 56) |
| <b>Intend to talk about pain control, but never get round to it</b> | 52<br>(47, 58)                       | 58<br>(52, 63) | 54<br>(48, 60) | 60<br>(54, 65) | 60<br>(55, 66) | 42<br>(36, 48) | 50<br>(48, 57) |
| <b>Constantly looking for new ideas to help with pain</b>           | 64<br>(59, 69)                       | 73<br>(68, 78) | 68<br>(63, 73) | 61<br>(56, 67) | 70<br>(65, 76) | 68<br>(62, 73) | 68<br>(60, 75) |
| <b>Mention the pain experienced</b>                                 | 86<br>(82, 90)                       | 87<br>(83, 90) | 77<br>(73, 82) | 91<br>(86, 94) | 93<br>(90, 96) | 91<br>(88, 94) | 86<br>(80, 91) |
| <b>Discuss the level of tiredness/fatigue</b>                       | 73<br>(68, 78)                       | 82<br>(78, 87) | 72<br>(67, 77) | 88<br>(84, 91) | 87<br>(84, 91) | 82<br>(78, 86) | 77<br>(70, 83) |
| <b>Experience pain on a daily basis</b>                             | 76<br>(71, 81)                       | 64<br>(58, 69) | 58<br>(52, 63) | 41<br>(36, 47) | 51<br>(46, 57) | 85<br>(81, 89) | 72<br>(65, 79) |
| <b>Currently take pain relief medication</b>                        | 80<br>(75, 84)                       | 78<br>(73, 82) | 70<br>(65, 75) | 63<br>(58, 69) | 79<br>(74, 84) | 82<br>(78, 86) | 74<br>(67, 81) |

**ONLINE SUPPLEMENTARY FIGURES**

**Supplementary Figure 1: RA disease severity in the survey populations**

**Good Days Fast survey**

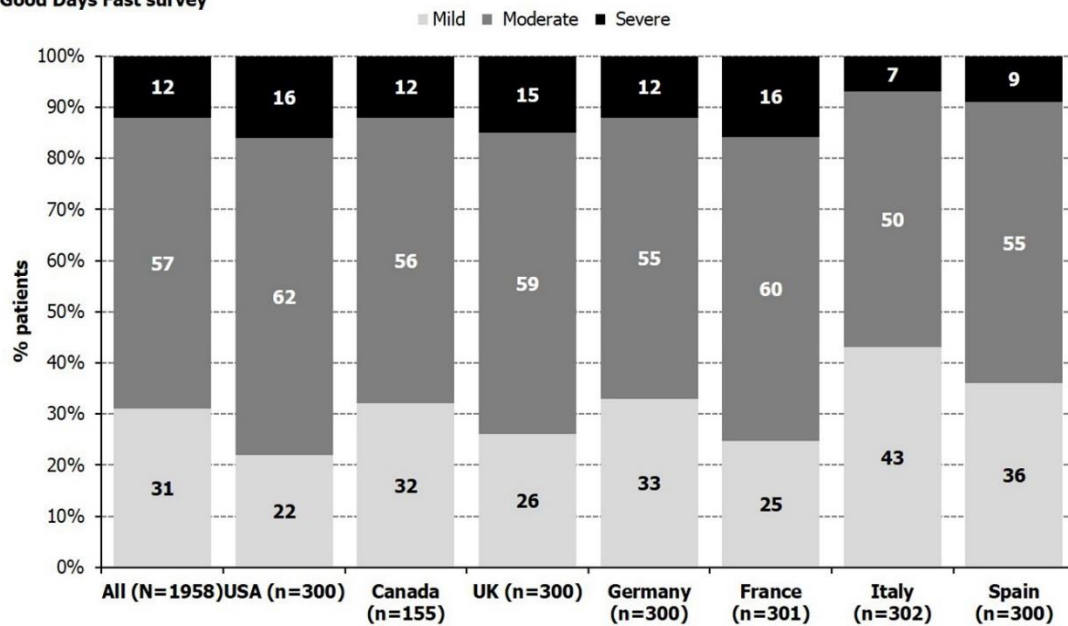

**Getting To Your Destination Faster survey**

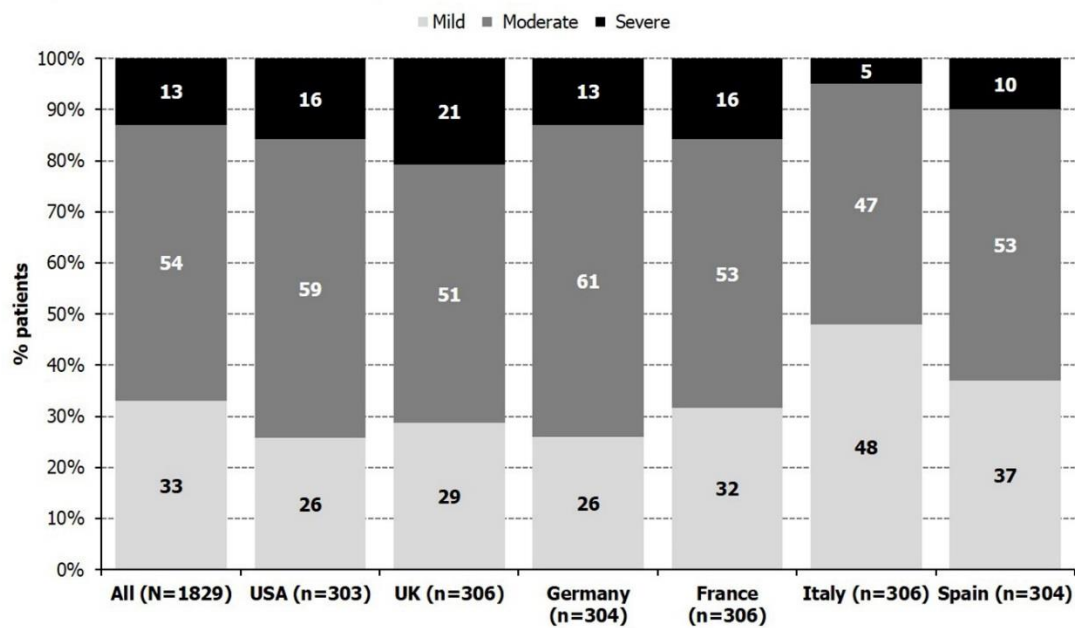

RA: rheumatoid arthritis.

**Supplementary Figure 2: Employment status and work productivity of survey participants by country**

A) Employment status

■ Employed ■ Full time education ■ Homemaker ■ Unemployed/receiving benefits ■ Retired ■ Other

**Good Days Fast survey**

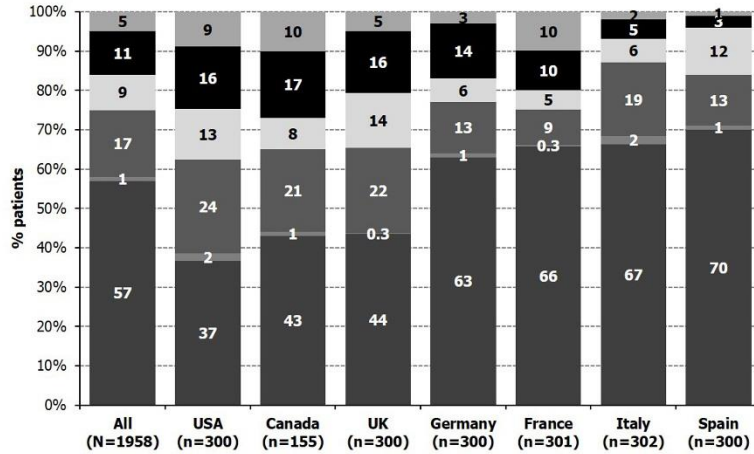

**Getting To Your Destination Faster survey**

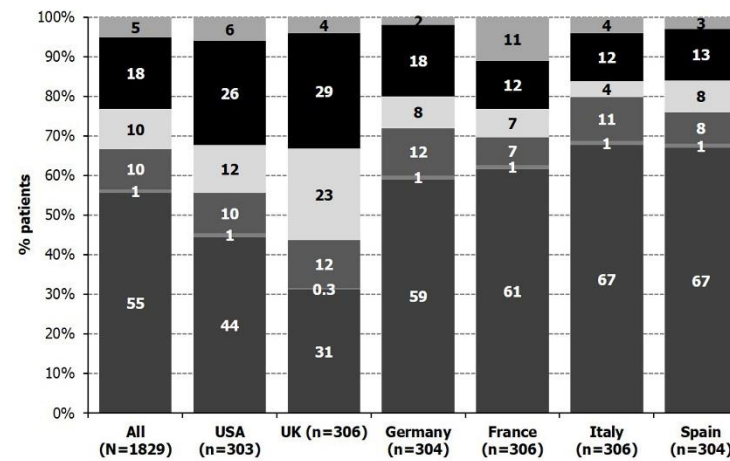

B) Work arrangements affected by RA (Good Days Fast survey; N=1958)

|                                       | % patients (95% confidence interval) |             |             |             |             |             |             |
|---------------------------------------|--------------------------------------|-------------|-------------|-------------|-------------|-------------|-------------|
|                                       | UK                                   | France      | Germany     | Italy       | Spain       | USA         | Canada      |
| Stop working/retire early             | 33 (28, 38)                          | 21 (16, 26) | 19 (15, 23) | 7 (4, 9)    | 9 (6, 12)   | 42 (36, 47) | 36 (29, 44) |
| Work part-time instead of full-time   | 14 (10, 18)                          | 17 (13, 21) | 21 (16, 26) | 15 (11, 19) | 19 (15, 24) | 13 (9, 16)  | 18 (12, 24) |
| Medical appointments during work time | 20 (15, 24)                          | 14 (10, 18) | 20 (16, 25) | 17 (13, 22) | 43 (37, 48) | 18 (13, 22) | 19 (13, 26) |
| Changed type of work                  | 13 (10, 17)                          | 25 (20, 30) | 14 (10, 18) | 12 (8, 15)  | 21 (16, 25) | 14 (10, 18) | 16 (10, 22) |
| Take >10 days sick off work/year      | 13 (9, 17)                           | 26 (21, 31) | 31 (25, 36) | 25 (20, 30) | 31 (26, 37) | 13 (9, 17)  | 12 (7, 17)  |
| Workstation/environment modified      | 11 (7, 14)                           | 16 (12, 20) | 12 (8, 16)  | 12 (8, 16)  | 15 (11, 19) | 8 (5, 11)   | 8 (4, 13)   |
| Resist career advancement             | 7 (4, 10)                            | 12 (8, 15)  | 13 (9, 17)  | 7 (4, 10)   | 10 (7, 13)  | 6 (3, 8)    | 9 (5, 14)   |
| Take a pay cut                        | 4 (2, 7)                             | 5 (3, 8)    | 15 (11, 19) | 6 (3, 9)    | 11 (7, 14)  | 5 (3, 8)    | 5 (2, 9)    |
| Inform work about your condition      | 27 (22, 32)                          | 34 (28, 39) | 24 (19, 29) | 23 (18, 28) | 27 (22, 32) | 22 (17, 26) | 27 (20, 33) |
| None of the above                     | 30 (25, 35)                          | 19 (14, 23) | 28 (23, 33) | 35 (29, 40) | 16 (12, 20) | 29 (24, 35) | 28 (21, 36) |

C) Work productivity and self-confidence at work affected by RA

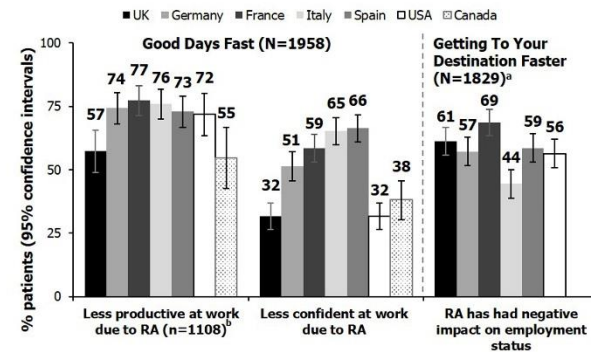

<sup>a</sup>For example, stopped working altogether, moved from full-time to part-time work, forced to change job or job role; <sup>b</sup>Employed/self-employed: UK, n=131; Germany, n=190; France, n=198; Italy, n=203; Spain, n=210; USA, n=110; Canada, n=66

**Supplementary Figure 3: Examples for activities frequently reported by patients to be compromised by RA by country (Good Days Fast survey; N=1958)**

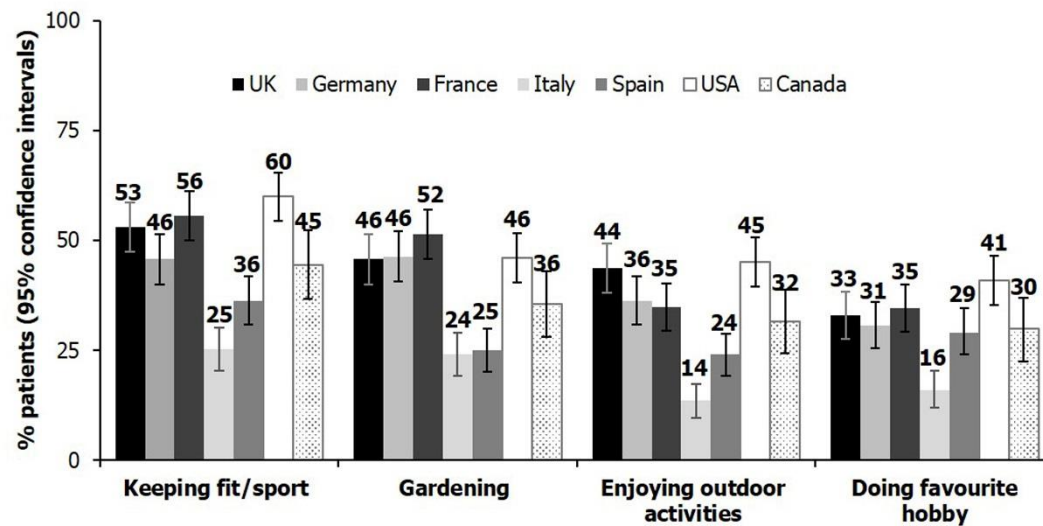

RA: rheumatoid arthritis.
